# Supplementary material for: Analytical Method Validation on Estimation of Rotigotine in Pharmaceutical Formulations
Source: Research Square preprint supplement (doi:10.21203/rs.3.rs-8161053/v1), 2025-12-08
Supplement: Supplementary file 1 [file 7d51f7cf8368269c566108da.docx]

**System suitability:**

Table S: System Suitability Parameters

| **S. No.** | **System suitability parameter** | **Result** |
| --- | --- | --- |
| 1 | Theoretical Plates | 3604 |
| 2 | Tailing Factor | 1.18 |
| 3 | % RSD | 0.10 |

Table S: System Suitability Areas

| **Injection No.** | **Area (mAU)** |
| --- | --- |
| **1** | 2142870 |
| **2** | 2142653 |
| **3** | 2142869 |
| **4** | 2144817 |
| **5** | 2147595 |
| **Average** | 2144160.68 |
| **STDEV** | 2111.42 |
| **% RSD** | 0.10 |

**System Precision**

Table S: System Precision Areas

| **Injection No.** | **Area (mAU)** |
| --- | --- |
| **1** | 2142870 |
| **2** | 2142653 |
| **3** | 2142869 |
| **4** | 2144817 |
| **5** | 2147595 |
| **6** | 2145009 |
| **Average** | 2144302.14 |
| **STDEV** | 1920.03 |
| **% RSD** | 0.09 |

**Specificity:**

***Table S4: Absolute difference between % Assay during specificity***

| Name of the sample | Assay (% w/w) of Rotigotine |
| --- | --- |
| As such sample | 100.53 |
| Spiked sample | 99.86 |
| Difference | 0.67 |

The absolute difference between the % Assay in such sample and the spiked sample is less than ±2.0%.

**Ruggedness (Intermediate Precision):**

***Table S5:*** ***Details of Variations during Ruggedness***

| S. No. | Changes | Method Precision | Ruggedness |
| --- | --- | --- | --- |
| 1 | Triethylamine | Merck (B. No. TF1Q786019) | Merck (B. No. TF1Q786019) |
| 2 | Orthophosphoric Acid | Merck (B. No. CF0C700316) | Merck (B. No. CB0C700056) |
| 3 | Methanol | Rankem (B. No. S176F76) | Merck (B. No. TM1ER24623) |
| 4 | Acetonitrile | Rankem (B. No. TO66G20) | Rankem (B. No. T038F20) |
| 5 | Date | 11 MAR 2024 | 08 APR 2024 |
| 6 | Column Details | LCC017/23 | LCC010/23 |
| 7 | Instrument Details | HPLC007 | HPLC019 |

Table S: System Suitability Parameters during Ruggedness

| **S. No.** | **System suitability parameter** | **Result** |
| --- | --- | --- |
| 1 | Theoretical Plates | 3812 |
| 2 | Tailing Factor | 1.21 |
| 3 | % RSD | 0.12 |

***Table S7: System Suitability*** ***Areas for Ruggedness***

| **Injection No.** | **Area (mAU)** |
| --- | --- |
| **1** | 2132857 |
| **2** | 2134772 |
| **3** | 2130727 |
| **4** | 2134796 |
| **5** | 2137561 |
| **Average** | 2134142.51 |
| **STDEV** | 2540.94 |
| **% RSD** | 0.12 |

***Table S8:*** ***Results of Method Precision & Intermediate Precision***

| Injection No. | Assay (%w/w) in  Method Precision | Assay (%w/w) in  Intermediate Precision |
| --- | --- | --- |
| 1 | 99.86 | 99.54 |
| 2 | 100.27 | 99.34 |
| 3 | 99.67 | 99.66 |
| 4 | 100.07 | 99.75 |
| 5 | 100.20 | 99.35 |
| 6 | 99.72 | 100.02 |
| Average | 99.97 | 99.61 |
| STDEV | 0.25 | 0.26 |
| %RSD | 0.25 | 0.26 |
| Overall Average | 99.79 | |
| Overall SD | 0.31 | |
| Overall RSD | 0.31 | |

**Linearity:**


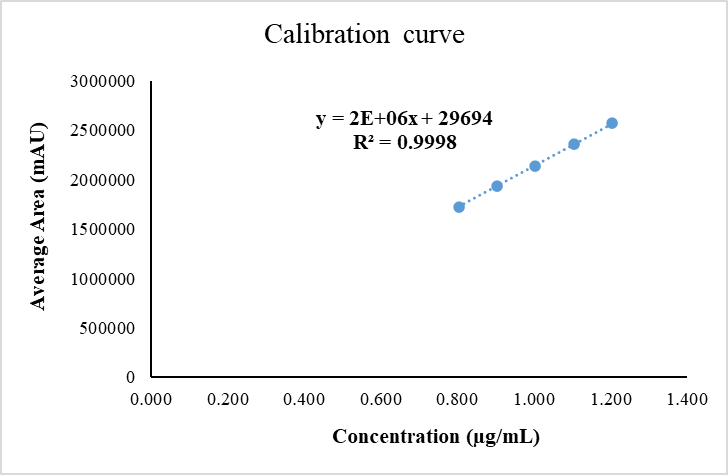


Figure S: Calibration curve of Rotigotine

**Robustness:**

***Table S9:*** ***Parameters varied during Robustness***

| Parameter | Actual | Low | High |
| --- | --- | --- | --- |
| Column Temperature | 40°C | 38°C | 42°C |
| Flow rate | 1.0 mL/min | 0.9 mL/min | 1.1 mL/min |

***Table S10: System Suitability Parameters observed during variation in column oven temp.***

| S. No | System Suitability Parameters | Actual Column Temperature (40°C) | Low Column Temperature (38°C) | High Column Temperature (42°C) |
| --- | --- | --- | --- | --- |
| 1 | Theoretical Plates | 3812 | 4529 | 2984 |
| 2 | Tailing Factor | 1.21 | 1.26 | 1.23 |
| 3 | %RSD | 0.12 | 0.11 | 0.19 |

***Table S11: System Suitability Parameters observed during variation in Flow Rate***

| S. No | System Suitability Parameters | Actual Flow Rate  (0.8 mL/min) | Low Flow Rate  (0.7 mL/min) | High Flow Rate  (0.9 mL/min) |
| --- | --- | --- | --- | --- |
| 1 | Theoretical Plates | 3812 | 4312 | 2874 |
| 2 | Tailing Factor | 1.21 | 1.30 | 1.24 |
| 3 | %RSD | 0.12 | 0.13 | 0.16 |

**Bench Top Solution Stability of Standard and Sample Solutions:**

***Table S12:*** ***Summary Results for solution stability study of standard solution and sample solution for Rotigotine***

| Time Interval | Similarity Factor for Standard | Sample Assay (%w/w) | Difference in %Assay of Sample |
| --- | --- | --- | --- |
| Initial | Not applicable | 99.50 | Not applicable |
| 48 hours at RT | 1.00 | 98.99 | 0.51 |

**Bench Top Stability of Mobile Phase:**

***Table S13: Summary Results for Mobile phase Stability Study***

| **System suitability parameter** | **Result** |
| --- | --- |
| Theoretical plates | 3931 |
| Tailing factor | 1.14 |
| % Relative standard deviation (RSD) | 0.12 |

**Filter Validation:**

***Table S14: Filter Details***

| Filter description | Filter | |
| --- | --- | --- |
| Nylon | PVDF |
| Manufacturer Name | mdi Membrane Technologies | mdi Membrane Technologies |
| Lot Number | SN7353G | SV2462L |
| Size in µm | 0.45 µm | 0.45 µm |

***Table S15: Assay Results for Filter Validation***

| **Filter details** | **% Assay** | **Absolute difference** |
| --- | --- | --- |
| Centrifuged | 99.50 | Not Applicable |
| Nylon filter | 99.72 | 0.22 |
| PVDF filter | 99.62 | 0.12 |
